# Supplementary material for: Concepts and definitions of healthy ageing: a systematic review and synthesis of theoretical models
Source: PubMed Central journal article supplement (PMC9852292; doi:10.1016/j.eclinm.2022.101821), 2023-01-12

**Contents**

**Supplement 1. Full search strategy per database ..... 2**

**Supplement 2. List of studies excluded at full text screening with reasons ..... 3**

**Supplement 3. Summary of findings ..... 8**

**Supplement 4. Inventory: Healthy ageing concept: antecedents, consequences, and attributes ..... 12**

## Supplementary Material

### Supplement 1. Full search strategy per database

| Database                                       | Search strategy                                                                                                                                                                                                                                                                                                                                                                                                                                                                                                                              |
|------------------------------------------------|----------------------------------------------------------------------------------------------------------------------------------------------------------------------------------------------------------------------------------------------------------------------------------------------------------------------------------------------------------------------------------------------------------------------------------------------------------------------------------------------------------------------------------------------|
| Embase.com                                     | (healthy aging'/de OR 'successful aging'/de OR (((healthy OR healthful OR healthier OR successful OR optimal OR well OR active OR robust OR positive OR productive OR effective OR phenotype*) NEAR/1 (ageing* OR aging*)):ab,ti) AND ((definition* OR construct* OR facet* OR domain* OR model* OR theor* OR concept* OR dimension* OR score* OR index* OR indices OR scal*):ab,ti) NOT ([animals]/lim NOT [humans]/lim) NOT ([Conference Abstract]/lim OR [Letter]/lim OR [Note]/lim OR [Editorial]/lim OR [Review]/lim OR [Preprint]/lim) |
| Medline ALL (Ovid)                             | (Healthy Aging/ OR (((healthy OR healthful OR successful OR optimal OR well OR active OR robust OR positive OR productive OR effective OR phenotype*) adj1 (ageing* OR aging*)):ab,ti.) AND ((definition* OR construct* OR facet* OR domain* OR model* OR theor* OR concept* OR dimension* OR score* OR index* OR indices OR scal*):ab,ti.) NOT (exp animals/ NOT humans/) NOT (letter OR news OR comment OR editorial OR congress OR abstracts OR review OR preprint).pt.                                                                   |
| Cochrane CENTRAL register of controlled trials | (((((healthy OR healthful OR healthier OR successful OR optimal OR well OR good OR active OR robust OR positive OR productive OR effective OR phenotype*) NEAR/1 (ageing* OR aging*)):ab,ti) AND ((definition* OR construct* OR facet* OR domain* OR model* OR theor* OR concept* OR dimension* OR score* OR index* OR indices OR scal*):ab,ti)                                                                                                                                                                                              |
| CINAHL (EBSCOhost)                             | (MH "Healthy Aging" OR (((healthy OR healthful OR successful OR optimal OR well OR active OR robust OR positive OR productive OR effective OR phenotype*) N1 (ageing* OR aging*))) AND (definition* OR construct* OR facet* OR domain* OR model OR models OR theor* OR concept* OR dimension* OR score* OR index* OR indices OR scal*) NOT (MH animals+ NOT MH humans+)) NOT PT (letter OR commentary OR response OR editorial OR abstract OR review)                                                                                        |
| PsycINFO (OvidSP)                              | (healthy aging/ OR (((healthy OR healthful OR successful OR optimal OR well OR active OR robust OR positive OR productive OR effective OR phenotype*) adj1 (ageing* OR aging*)):ab,ti.) AND ((definition* OR construct* OR facet* OR domain* OR model* OR theor* OR concept* OR dimension* OR score* OR index* OR indices OR scal*):ab,ti.) NOT (exp animals/ NOT humans/) NOT (letter OR comment OR editorial OR abstract OR review*).dt                                                                                                    |
| Web of Science Core Collection                 | TS=(((healthy OR healthful OR successful* OR optimal* OR well OR active OR robust OR positive OR productive OR effective OR phenotype*) NEAR/0 ("ageing*" OR "aging*"))) AND TS=(definition* OR construct* OR facet* OR domain* OR model OR models OR theor* OR concept* OR dimension* OR score* OR index OR indices OR scal*) NOT TS=((animal* OR plant* OR rats OR mice OR pigs OR murine OR primate* OR monkey*) NOT (human* OR patient*)) AND DT=(article OR early access)                                                               |

**Supplement 2. List of studies excluded at full text screening with reasons**

| Author                | Year | Title                                                                                                                | Reason for exclusion (n=84)                                               |
|-----------------------|------|----------------------------------------------------------------------------------------------------------------------|---------------------------------------------------------------------------|
| Pincus                | 1967 | Toward a Developmental View of Aging for Social Work                                                                 | Review or critique without a clear model that fits criteria for inclusion |
| Ryff                  | 1982 | Successful Aging: A Developmental Approach                                                                           | Review or critique without a clear model that fits criteria for inclusion |
| Johnson               | 1995 | Ageing well in contemporary society                                                                                  | Review or critique without a clear model that fits criteria for inclusion |
| Minkler et al         | 2002 | Successful ageing                                                                                                    | Review or critique without a clear model that fits criteria for inclusion |
| Aguerre et al         | 2003 | Successful aging: Theory, research and clinical applications                                                         | Review or critique without a clear model that fits criteria for inclusion |
| Wiesman et al         | 2004 | Salutogenesis in old age                                                                                             | Review or critique without a clear model that fits criteria for inclusion |
| Chapman               | 2005 | Theorizing about aging well: Constructing a narrative                                                                | Review or critique without a clear model that fits criteria for inclusion |
| Rohr et al            | 2009 | Aging well together-A mini-review                                                                                    | Review or critique without a clear model that fits criteria for inclusion |
| Carrascosa-Gil et al  | 2010 | Successful aging: a holistic perspective                                                                             | Review or critique without a clear model that fits criteria for inclusion |
| Fernandez-Ballesteros | 2011 | Positive ageing: Objective, subjective, and combined outcomes                                                        | Review or critique without a clear model that fits criteria for inclusion |
| Friedman et al        | 2012 | Theoretical perspectives: A biopsychosocial approach to positive aging                                               | Review or critique without a clear model that fits criteria for inclusion |
| Boudiny               | 2013 | Active ageing: from empty rhetoric to effective policy tool                                                          | Review or critique without a clear model that fits criteria for inclusion |
| Fereshtehnejad et al  | 2014 | Active Aging for Individuals with Parkinson's Disease: Definitions, Literature Review, and Models                    | Review or critique without a clear model that fits criteria for inclusion |
| Ji H                  | 2015 | Successful aging in the United States and China: a theoretical basis to guide nursing research, practice, and policy | Review or critique without a clear model that fits criteria for inclusion |
| Midlarsky E           | 2015 | Prosocial behavior in late life                                                                                      | Review or critique without a clear model that fits criteria for inclusion |
| Zacher H              | 2015 | The Importance of a Precise Definition, Comprehensive Model, and Critical Discussion of Successful Aging at Work     | Review or critique without a clear model that fits criteria for inclusion |
| Hanson et al          | 2016 | Developmental aspects of a life course approach to healthy ageing                                                    | Review or critique without a clear model that fits criteria for inclusion |
| Repeprmund et al      | 2016 | Successful ageing for people with an intellectual disability                                                         | Review or critique without a clear model that fits criteria for inclusion |
| Geard et al           | 2017 | Masters Athletes: Exemplars of Successful Aging?                                                                     | Review or critique without a clear model that fits criteria for inclusion |
| Cosco et al           | 2018 | Psychosocial aspects of successful ageing and resilience: Critique, integration and implications                     | Review or critique without a clear model that fits criteria for inclusion |
| Serrano               | 2018 | Active ageing: A paradigm for understanding and governing                                                            | Review or critique without a clear model that fits criteria for inclusion |
| Attila                | 2019 | A pozitív öregedés pszichológiai forrásai                                                                            | Review or critique without a clear model that fits criteria for inclusion |
| Quigley et al         | 2022 | Aging Well for Indigenous Peoples: A Scoping Review                                                                  | Review or critique without a clear model that fits criteria for inclusion |
| Pocock et al          | 2022 | Diverse approaches to conceptualising positive ageing: A scoping review                                              | Review or critique without a clear model that fits criteria for inclusion |

|                  |      |                                                                                                                                            |                                                                                                                                                            |
|------------------|------|--------------------------------------------------------------------------------------------------------------------------------------------|------------------------------------------------------------------------------------------------------------------------------------------------------------|
| Johansson        | 1987 | Declining resources in old age: Theoretical aspects and implications for an old-age policy                                                 | Book/chapter/dissertation                                                                                                                                  |
| Featherman et al | 1990 | Successful aging in a post-retired society                                                                                                 | Book/chapter/dissertation                                                                                                                                  |
| Thomae           | 1990 | Stress, satisfaction, competence: Findings from the Bonn Longitudinal Study on Aging                                                       | Book/chapter/dissertation                                                                                                                                  |
| Baltes           | 1992 | Wisdom and successful aging                                                                                                                | Book/chapter/dissertation                                                                                                                                  |
| Brandtstadter    | 1993 | Development, aging, and control: Empirical and theoretical issues                                                                          | Book/chapter/dissertation                                                                                                                                  |
| Dsouza           | 1993 | The concept of active ageing                                                                                                               | Book/chapter/dissertation                                                                                                                                  |
| Midlarsky et al  | 1994 | Altruism in later life                                                                                                                     | Book/chapter/dissertation                                                                                                                                  |
| Kahana et al     | 1996 | Conceptual and empirical advances in understanding aging well through proactive adaptation                                                 | Book/chapter/dissertation                                                                                                                                  |
| De Oliveira      | 2002 | Aging: Scientific versus folk theories                                                                                                     | Book/chapter/dissertation                                                                                                                                  |
| Guo              | 2007 | Self-imposed activity limitation among community dwelling elders                                                                           | Book/chapter/dissertation                                                                                                                                  |
| Szanton et al    | 2010 | The society-to-cells model of resilience in older adults                                                                                   | Book/chapter/dissertation                                                                                                                                  |
| Maddox           | 1965 | Fact and Artifact: Evidence Bearing on Disengagement Theory from the Duke Geriatrics Project                                               | Design (Conference/empirical/validation/score/clinical/intervention frameworks/mathematical modeling/opinion/psychological stage development theory/other) |
| Band             | 1977 | Continuity of life situation and successful ageing (German)                                                                                | Design (Conference/empirical/validation/score/clinical/intervention frameworks/mathematical modeling/opinion/psychological stage development theory/other) |
| Tempelman        | 1977 | Successful ageing: A new learning theory viewpoint (Dutch)                                                                                 | Design (Conference/empirical/validation/score/clinical/intervention frameworks/mathematical modeling/opinion/psychological stage development theory/other) |
| Deshpande et al  | 1990 | Non-Monotonic Ageing                                                                                                                       | Design (Conference/empirical/validation/score/clinical/intervention frameworks/mathematical modeling/opinion/psychological stage development theory/other) |
| Wacks            | 1994 | Realizing our inner elder-child: Toward the possible human                                                                                 | Design (Conference/empirical/validation/score/clinical/intervention frameworks/mathematical modeling/opinion/psychological stage development theory/other) |
| Kerschner        | 1998 | Productive ageing: a quality of life agenda                                                                                                | Design (Conference/empirical/validation/score/clinical/intervention frameworks/mathematical modeling/opinion/psychological stage development theory/other) |
| Nussbaum         | 2000 | Message Production Across the Life Span: Communication and Aging                                                                           | Design (Conference/empirical/validation/score/clinical/intervention frameworks/mathematical modeling/opinion/psychological stage development theory/other) |
| Parker et al     | 2001 | Soldier and Family Wellness across the Life Course: A Developmental Model of Successful Aging, Spirituality, and Health Promotion, Part II | Design (Conference/empirical/validation/score/clinical/intervention frameworks/mathematical modeling/opinion/psychological stage development theory/other) |
| Fries            | 2002 | Successful aging—an emerging paradigm of gerontology                                                                                       | Design (Conference/empirical/validation/score/clinical/intervention frameworks/mathematical modeling/opinion/psychological stage development theory/other) |
| Torres           | 2002 | Relational Values and Ideas Regarding "Successful Aging"*                                                                                  | Design (Conference/empirical/validation/score/clinical/intervention frameworks/mathematical modeling/opinion/psychological stage development theory/other) |

|                             |      |                                                                                                                                     |                                                                                                                                                            |
|-----------------------------|------|-------------------------------------------------------------------------------------------------------------------------------------|------------------------------------------------------------------------------------------------------------------------------------------------------------|
| Torres                      | 2003 | A preliminary empirical test of a culturally-relevant theoretical framework for the study of successful aging                       | Design (Conference/empirical/validation/score/clinical/intervention frameworks/mathematical modeling/opinion/psychological stage development theory/other) |
| Bowling et al               | 2006 | Which model of successful ageing should be used? Baseline study from a British longitudinal survey of ageing                        | Design (Conference/empirical/validation/score/clinical/intervention frameworks/mathematical modeling/opinion/psychological stage development theory/other) |
| Harris                      | 2008 | Another wrinkle in the debate about successful aging: The undervalued concept of resilience and the lived experience of dementia    | Design (Conference/empirical/validation/score/clinical/intervention frameworks/mathematical modeling/opinion/psychological stage development theory/other) |
| Fernandez-Ballesteros et al | 2010 | The concept of 'ageing well' in ten Latin American and European countries                                                           | Design (Conference/empirical/validation/score/clinical/intervention frameworks/mathematical modeling/opinion/psychological stage development theory/other) |
| Swindel                     | 2010 | Indicators of "healthy aging" in older women (65-69 years of age). A data-mining approach based on prediction of long-term survival | Design (Conference/empirical/validation/score/clinical/intervention frameworks/mathematical modeling/opinion/psychological stage development theory/other) |
| Lee et al                   | 2011 | Aging successfully: A four-factor model                                                                                             | Design (Conference/empirical/validation/score/clinical/intervention frameworks/mathematical modeling/opinion/psychological stage development theory/other) |
| Lezwijn                     | 2011 | Healthy ageing in a salutogenic way: Building the HP 2.0 framework                                                                  | Design (Conference/empirical/validation/score/clinical/intervention frameworks/mathematical modeling/opinion/psychological stage development theory/other) |
| Parslow                     | 2011 | Successful Aging: Development and Testing of a Multidimensional Model Using Data From a Large Sample of Older Australians           | Design (Conference/empirical/validation/score/clinical/intervention frameworks/mathematical modeling/opinion/psychological stage development theory/other) |
| Cho et al                   | 2012 | The Older They Are, the Less Successful They Become? Findings from the Georgia Centenarian Study                                    | Design (Conference/empirical/validation/score/clinical/intervention frameworks/mathematical modeling/opinion/psychological stage development theory/other) |
| Doyle et al                 | 2012 | A model of successful ageing in British populations                                                                                 | Design (Conference/empirical/validation/score/clinical/intervention frameworks/mathematical modeling/opinion/psychological stage development theory/other) |
| Jeon                        | 2012 | Dynamics of Constructs in Successful Aging of Korean Elderly: Modified Rowe and Kahn's Model                                        | Design (Conference/empirical/validation/score/clinical/intervention frameworks/mathematical modeling/opinion/psychological stage development theory/other) |
| Paul et al                  | 2012 | Active Ageing: An Empirical Approach to the WHO Model                                                                               | Design (Conference/empirical/validation/score/clinical/intervention frameworks/mathematical modeling/opinion/psychological stage development theory/other) |
| Randall                     | 2012 | Successful aging: A psychosocial resources model for very old adults                                                                | Design (Conference/empirical/validation/score/clinical/intervention frameworks/mathematical modeling/opinion/psychological stage development theory/other) |
| Vahia et al                 | 2012 | Developing a dimensional model for successful cognitive and emotional aging                                                         | Design (Conference/empirical/validation/score/clinical/intervention frameworks/mathematical modeling/opinion/psychological stage development theory/other) |

|                  |      |                                                                                                                                                     |                                                                                                                                                            |
|------------------|------|-----------------------------------------------------------------------------------------------------------------------------------------------------|------------------------------------------------------------------------------------------------------------------------------------------------------------|
| Woods et al      | 2012 | Toward a positive aging phenotype for older women: observations from the women's health initiative                                                  | Design (Conference/empirical/validation/score/clinical/intervention frameworks/mathematical modeling/opinion/psychological stage development theory/other) |
| Cosco et al      | 2013 | Deathless models of aging and the importance of acknowledging the dying process                                                                     | Design (Conference/empirical/validation/score/clinical/intervention frameworks/mathematical modeling/opinion/psychological stage development theory/other) |
| Lamb             | 2014 | Permanent personhood or meaningful decline? Toward a critical anthropology of successful aging                                                      | Design (Conference/empirical/validation/score/clinical/intervention frameworks/mathematical modeling/opinion/psychological stage development theory/other) |
| Pietrzak et al   | 2014 | Successful aging among older veterans in the United States                                                                                          | Design (Conference/empirical/validation/score/clinical/intervention frameworks/mathematical modeling/opinion/psychological stage development theory/other) |
| Tam et al        | 2014 | Understanding and theorizing the role of culture in the conceptualizations of successful aging and lifelong learning                                | Design (Conference/empirical/validation/score/clinical/intervention frameworks/mathematical modeling/opinion/psychological stage development theory/other) |
| Benberin et al   | 2015 | Medical social modeling technologies for active ageing in Kazakhstan                                                                                | Design (Conference/empirical/validation/score/clinical/intervention frameworks/mathematical modeling/opinion/psychological stage development theory/other) |
| Cho et al        | 2014 | Successful Aging and Subjective Well-Being Among Oldest-Old Adults                                                                                  | Design (Conference/empirical/validation/score/clinical/intervention frameworks/mathematical modeling/opinion/psychological stage development theory/other) |
| Oliver et al     | 2016 | Validación de un modelo explicativo del proceso de envejecer con éxito a partir de aspectos psicológicos, físicos, relacionales y de ocio (Spanish) | Design (Conference/empirical/validation/score/clinical/intervention frameworks/mathematical modeling/opinion/psychological stage development theory/other) |
| Peisah           | 2016 | Successful ageing for psychiatrists                                                                                                                 | Design (Conference/empirical/validation/score/clinical/intervention frameworks/mathematical modeling/opinion/psychological stage development theory/other) |
| Gawcett et al    | 2017 | Optimal Aging: A Neuman Systems Model Perspective                                                                                                   | Design (Conference/empirical/validation/score/clinical/intervention frameworks/mathematical modeling/opinion/psychological stage development theory/other) |
| Cesari et al     | 2018 | Evidence for the Domains Supporting the Construct of Intrinsic Capacity                                                                             | Design (Conference/empirical/validation/score/clinical/intervention frameworks/mathematical modeling/opinion/psychological stage development theory/other) |
| Gore et al       | 2018 | New horizons in the compression of functional decline                                                                                               | Design (Conference/empirical/validation/score/clinical/intervention frameworks/mathematical modeling/opinion/psychological stage development theory/other) |
| Ko et al         | 2019 | Childhood conditions and productive aging in China                                                                                                  | Design (Conference/empirical/validation/score/clinical/intervention frameworks/mathematical modeling/opinion/psychological stage development theory/other) |
| McGarrigle et al | 2019 | Cognitive Reserve Capacity: Exploring and Validating a Theoretical Model in Healthy Ageing                                                          | Design (Conference/empirical/validation/score/clinical/intervention frameworks/mathematical modeling/opinion/psychological stage development theory/other) |

|                     |      |                                                                                                                                                     |                                                                                                                                                            |
|---------------------|------|-----------------------------------------------------------------------------------------------------------------------------------------------------|------------------------------------------------------------------------------------------------------------------------------------------------------------|
| Sebert et al        | 2019 | Cohort Profile: The DynaHEALTH consortium – a European consortium for a life-course bio-psychosocial model of healthy ageing of glucose homeostasis | Design (Conference/empirical/validation/score/clinical/intervention frameworks/mathematical modeling/opinion/psychological stage development theory/other) |
| صفورا دري*          | 2019 | Farsi( مفهوم سالمندی فعال در یه ابتلا به د ت یک مقاله کیفی )                                                                                        | Design (Conference/empirical/validation/score/clinical/intervention frameworks/mathematical modeling/opinion/psychological stage development theory/other) |
| Lucena et al        | 2020 | Multidimensional model of successful aging and nursing terminologies: similarities for use in the clinical practice                                 | Design (Conference/empirical/validation/score/clinical/intervention frameworks/mathematical modeling/opinion/psychological stage development theory/other) |
| Mendoza-Núñez et al | 2018 | Modelo comunitario de envejecimiento saludable enmarcado en la resiliencia y la generatividad (Spanish)                                             | Duplicate                                                                                                                                                  |
| Chandler            | 1948 | Cicer's ideal old man                                                                                                                               | Citation tracking (exclude, design (review/stage theory, opinion/other)                                                                                    |
| Rose                | 1962 | The Subculture of the Aging: A Topic for Sociological Research1                                                                                     | Citation tracking (exclude, design (review/stage theory, opinion/other)                                                                                    |
| Robert              | 1974 | Successful Aging and the Role of the Life Review*                                                                                                   | Citation tracking (exclude, design (review/stage theory, opinion/other)                                                                                    |
| Ryff                | 1982 | Successful Aging: A Developmental Approach                                                                                                          | Citation tracking (exclude, design (review/stage theory, opinion/other)                                                                                    |
| Tornstam            | 1989 | Gero-transcendence: A reformulation of the disengagement theory                                                                                     | Citation tracking (exclude, design (review/stage theory, opinion/other)                                                                                    |
| Baltes              | 1993 | The Aging Mind: Potential and Limits                                                                                                                | Citation tracking (exclude, design (review/stage theory, opinion/other)                                                                                    |
| Antonovsky          | 1996 | The salutogenic model as a theory to guide health promotion                                                                                         | Citation tracking (exclude, design (review/stage theory, opinion/other)                                                                                    |

### Supplement 3. Summary of findings

| Summary of findings (Supplementary Material)   |                                                          |                  |                    |                      |
|------------------------------------------------|----------------------------------------------------------|------------------|--------------------|----------------------|
|                                                | Country of publication (corresponding author)            | Year             | # of papers        | % from papers        |
|                                                | Brazil                                                   | 2021             | 1                  | 2%                   |
|                                                | Canada                                                   | 2006             | 1                  | 2%                   |
|                                                | China                                                    | 2013             | 1                  | 2%                   |
|                                                | Germany                                                  | 1993-2017        | 6                  | 10%                  |
|                                                | Italy                                                    | 2021             | 1                  | 2%                   |
|                                                | Jamaica                                                  | 2016             | 1                  | 2%                   |
|                                                | Mexico                                                   | 2017-2022        | 3                  | 5%                   |
|                                                | New Zealand                                              | 2015             | 1                  | 2%                   |
|                                                | Philippines                                              | 2022             | 1                  | 2%                   |
|                                                | Spain                                                    | 2012             | 1                  | 2%                   |
|                                                | Sweden                                                   | 1999,2015        | 2                  | 3%                   |
|                                                | Switzerland                                              | 2003,2021        | 2                  | 3%                   |
|                                                | Taiwan                                                   | 2013             | 1                  | 2%                   |
|                                                | The Netherlands                                          | 1998-2020        | 5                  | 8%                   |
|                                                | UK                                                       | 2001             | 1                  | 2%                   |
|                                                | USA                                                      | 1960-2019        | 31                 | 53%                  |
| <b>Sub-total (papers)</b>                      | <b>16</b>                                                | <b>1960-2022</b> | <b>59</b>          | <b>100%</b>          |
|                                                |                                                          |                  |                    |                      |
| <b>Normative Terms (59 papers, 65 models)</b>  |                                                          |                  | <b># of models</b> | <b>% from models</b> |
| Active Ageing                                  | Switzerland, The Netherlands, Jamaica, Mexico            | 2003-2017        | 4                  | 6%                   |
| Adjustment to ageing                           | USA                                                      | 1966,1982        | 2                  | 3%                   |
| Ageing (normative approach)                    | USA                                                      | 1972-1999        | 3                  | 5%                   |
| Ageing well                                    | USA, Canada, Germany                                     | 1991,2006,2012   | 5                  | 8%                   |
| Ageing theories                                | USA                                                      | 1960,1972,199    | 3                  | 5%                   |
| Compression of morbidity (normative to ageing) | USA                                                      | 1980             | 1                  | 2%                   |
| Graceful ageing                                | Taiwan                                                   | 2013             | 1                  | 2%                   |
| Healthy ageing, Child health in healthy ageing | Italy, Brazil, Switzerland, Mexico, USA, The Netherlands | 2005-2021        | 8                  | 12%                  |
| Mindful Sustainable Ageing                     | Sweden                                                   | 2015             | 1                  | 2%                   |



|                                                    |                                                                        |                |             |     |
|----------------------------------------------------|------------------------------------------------------------------------|----------------|-------------|-----|
| Positive ageing                                    | USA                                                                    | 2011           | 1           | 2%  |
| Productive ageing/engagement                       | China, USA, Mexico                                                     | 2013,2017,2022 | 3           | 5%  |
| Resilient/optimal ageing                           | Germany, USA                                                           | 1993,2014      | 2           | 3%  |
| Successful ageing                                  | USA, UK, Netherlands, Sweden, Spain, Germany, New Zealand, Philippines | 1961-2022      | 34          | 52% |
| of which                                           | USA                                                                    | 1961-2019      | 18          | 53% |
|                                                    | UK                                                                     | 2001           | 1           | 3%  |
|                                                    | The Netherlands                                                        | 1998,2015,2020 | 3           | 9%  |
|                                                    | Sweden                                                                 | 1999           | 1           | 3%  |
|                                                    | Spain                                                                  | 2012           | 1           | 3%  |
|                                                    | Germany                                                                | 1996-2017      | 4           | 12% |
|                                                    | New Zealand                                                            | 2015           | 1           | 3%  |
|                                                    | Philippines                                                            | 2022           | 1           | 3%  |
|                                                    |                                                                        |                |             |     |
| <b>Total number of terms used</b>                  | 12                                                                     |                |             |     |
| <b>Number of articles (models) included</b>        | 59 (61 models, 4 derived definitions )                                 |                |             |     |
| <b>Language</b>                                    | English                                                                |                |             |     |
| <b>Years of publication</b>                        |                                                                        | 1960 to 2022   |             |     |
|                                                    |                                                                        |                |             |     |
| <b>Models/theories in specific contexts/groups</b> | Out of 65 models                                                       | 15             | 23%         |     |
|                                                    | Chinese/Americans populations                                          | 2              | 13%         |     |
|                                                    | People living with HIV                                                 | 2              | 13%         |     |
|                                                    | Lesbian, Gay, Bisexual people                                          | 3              | 20%         |     |
|                                                    | People in LMICs                                                        | 1              | 7%          |     |
|                                                    | Child health in healthy ageing                                         | 1              | 7%          |     |
|                                                    | People ageing at work                                                  | 5              | 33%         |     |
|                                                    | People with care needs                                                 | 1              | 7%          |     |
| <b>Sub-total (models)</b>                          |                                                                        | <b>15</b>      | <b>100%</b> |     |
|                                                    |                                                                        |                |             |     |
| <b>Paradigm</b>                                    |                                                                        |                |             |     |
|                                                    | Theoretical or philosophical                                           | 65             | 100%        |     |

|                                                                                                        |                                                         |           |               |
|--------------------------------------------------------------------------------------------------------|---------------------------------------------------------|-----------|---------------|
|                                                                                                        | Practical outlook                                       | 12        | 18%           |
|                                                                                                        | Empirically validated original data                     | 6         | 9%            |
|                                                                                                        | Derived definitions                                     | 1 theory  | 4 definitions |
|                                                                                                        | Theory with definition or description                   | 8         | 12%           |
|                                                                                                        | Middle-range theories                                   | 3         | 38%           |
|                                                                                                        | Concept analyses                                        | 7         | 11%           |
|                                                                                                        | Based on other conceptual frameworks                    | 45        | 69%           |
| <b>Source (Papers)</b>                                                                                 |                                                         |           |               |
|                                                                                                        | Original/secondary source articles (not forward search) | 45        | 76%           |
|                                                                                                        | Forward search                                          | 7         | 12%           |
|                                                                                                        | Concept analyses                                        | 7         | 12%           |
| <b>Sub-total (papers)</b>                                                                              |                                                         | <b>59</b> | <b>100%</b>   |
| <b>Approach (models)</b>                                                                               |                                                         |           |               |
|                                                                                                        | Lifecourse                                              | 62        | 95%           |
|                                                                                                        | Outcome                                                 | 3         | 5%            |
| <b>Sub-total (models)</b>                                                                              |                                                         | <b>65</b> | <b>100%</b>   |
| <b>Dimensions in models/theories/definitions (several models could be in same article) (out of 65)</b> |                                                         |           |               |
|                                                                                                        | 2 to 9                                                  |           |               |
|                                                                                                        | Cognitive                                               | 62        | 95%           |
|                                                                                                        | Cultural                                                | 8         | 12%           |
|                                                                                                        | Demographic                                             | 4         | 6%            |
|                                                                                                        | Economic                                                | 13        | 20%           |
|                                                                                                        | Environmental                                           | 19        | 29%           |
|                                                                                                        | Political                                               | 6         | 9%            |
|                                                                                                        | Psychological                                           | 53        | 82%           |
|                                                                                                        | Physical                                                | 49        | 75%           |
|                                                                                                        | Social                                                  | 49        | 75%           |
|                                                                                                        | Spiritual                                               | 16        | 25%           |

| <b>Dimensions number per model</b>        | <b>Number of dimensions</b> | <b>Number of models</b> | <b>%</b>    |
|-------------------------------------------|-----------------------------|-------------------------|-------------|
|                                           | 2                           | 8                       | 12%         |
|                                           | 3                           | 11                      | 17%         |
|                                           | 4                           | 19                      | 29%         |
|                                           | 5                           | 16                      | 25%         |
|                                           | 6                           | 5                       | 8%          |
|                                           | 7                           | 3                       | 5%          |
|                                           | 8                           | 1                       | 2%          |
|                                           | 9                           | 2                       | 3%          |
| <b>Sub-total (models)</b>                 |                             | <b>65</b>               | <b>100%</b> |
| <b>Subjective or objective dimensions</b> |                             |                         |             |
|                                           | Objective                   | 8                       | 12%         |
|                                           | Subjective, Objective       | 57                      | 88%         |
| <b>Sub-total (models)</b>                 |                             | <b>65</b>               | <b>100%</b> |

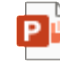

**Supplement 4. Inventory: Healthy ageing concept: antecedents, consequences, and attributes**

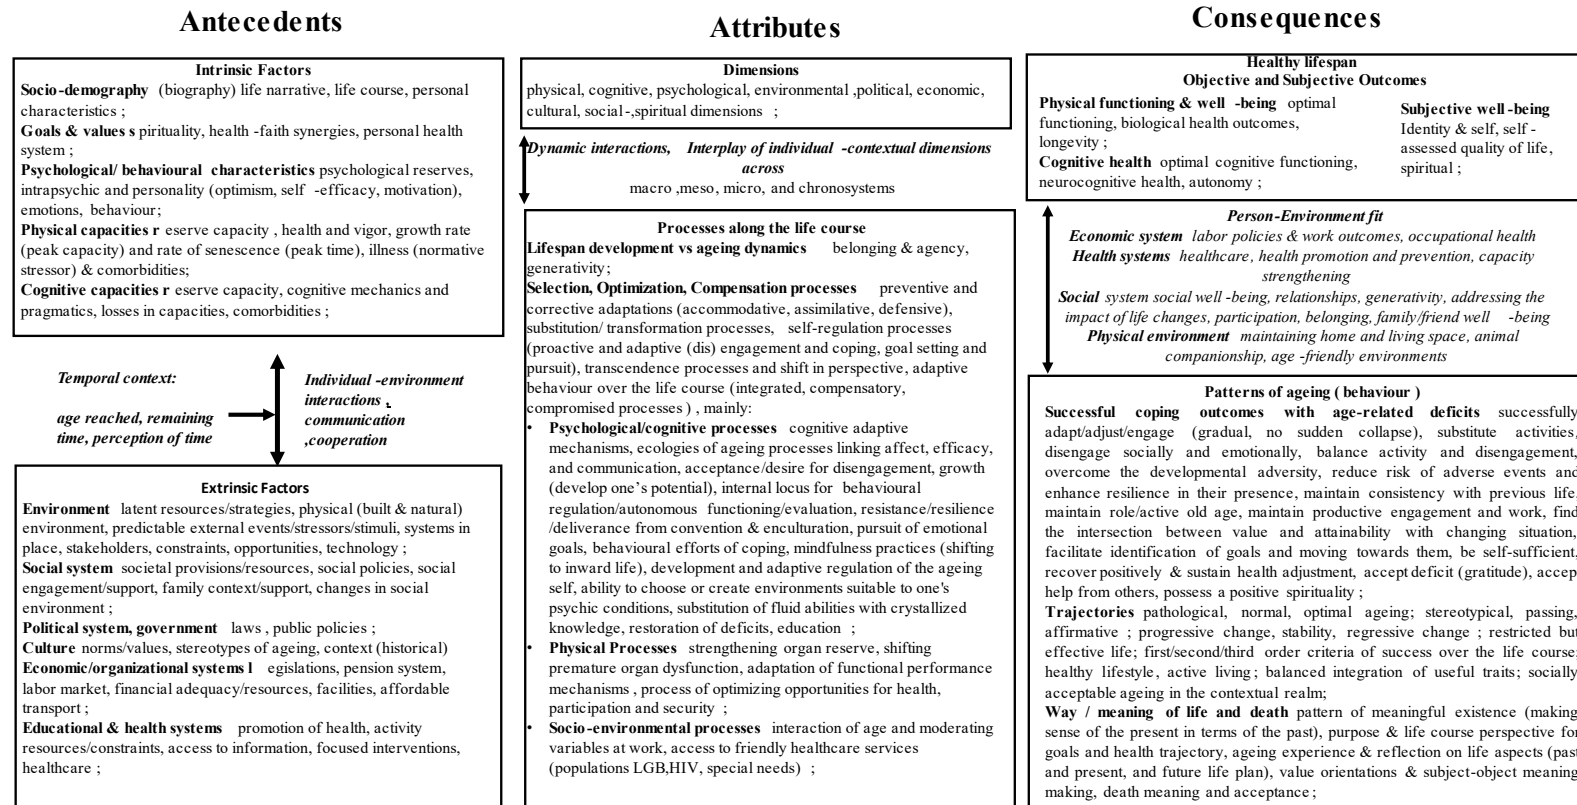

Supplement: mmc2.pdf [file mmc2.pdf]
